# Supplementary material for: Discovery of Bioactive Compounds From Medicinal Plants: Insights Into Wrightia Tinctoria as a Potential Antistaphylococcal Agent Targeting
Source: Research Square preprint supplement (doi:10.21203/rs.3.rs-6232250/v1), 2025-05-07
Supplement: Supplementary file 1 [file 06109e879a33c48f28af9eb2.docx]

**DISCOVERY OF BIOACTIVE COMPOUNDS FROM MEDICINAL PLANTS: INSIGHTS INTO *WRIGHTIA TINCTORIA* AS A POTENTIAL ANTISTAPHYLOCOCCAL AGENT TARGETING CLUMPING FACTOR A**

**Vidya. S., Anantha Bhairavi., Sathishkumar..**

1. Department of Biotechnology, Kongunadu Arts and Science College, Coimbatore- 641029, Tamil Nadu, India.

*Corresponding Author: Sathishkumar R

ORCID ID: 0000-0002-0546-8951

EMAIL: [rsathishkumar_bt@kongunaducollege.ac.in](mailto:rsathishkumar_bt@kongunaducollege.ac.in)

Vidya S L

ORCID ID: 0000-0002-7362-782X

EMAIL: [vidyasl95@gmail.com](mailto:vidyasl95@gmail.com)

Anantha Bhairavi V

ORCID ID: 0000-0002-6771-4900

EMAIL: [ananthabhairavi24@gmail.com](mailto:ananthabhairavi24@gmail.com)

**Supplementary File**

**Table 1: List of Phytochemicals/ secondary metabolites for respective medicinal plants chosen for the study**

| **S.No.** | **Compound Name** | **PubChem ID** | **Compound Structure** |
| --- | --- | --- | --- |
| 1 | 17 beta-hydroxy-28-norolean-12-ene-3,16-dione | 102067273 | 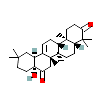 |
| 2 | 2,3,3-Trimethyl-2-(4methyl pentanoyl)-cyclopentanone | 573846 | 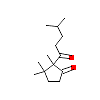 |
| 3 | 4-(2-Methoxy phenyl) piperidine | 544738 | 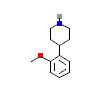 |
| 4 | 5-Benzyloxypyrimidine-2-carboxylic acid | 561874 | 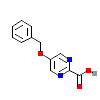 |
| 5 | Acacetin | 5280442 | 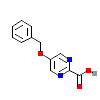 |
| 6 | Benzofuran 2,3, dihydro | 20209882 | 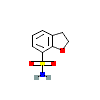 |
| 7 | Diethyl Phthalate | 6781 | 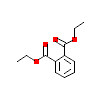 |
| 8 | Ephedrine | 9294 | 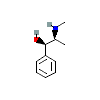 |
| 9 | Epicatechin | 72276 | 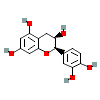 |
| 10 | Indirubin | 10177 | 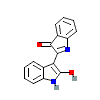 |
| 11 | Indigo | 10215 | 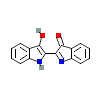 |
| 12 | Isatin | 7054 | 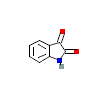 |
| 13 | Palmitic acid | 985 | 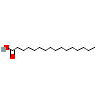 |
| 14 | Phytol | 5280435 | 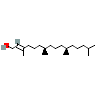 |
| 15 | Purpurin | 6683 | 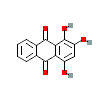 |
| 16 | Semiglabrin | 3353369 | 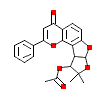 |
| 17 | Ursolic acid | 64945 | 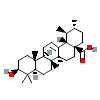 |
| 18 | Urs-12-en-3beta-ol | 225688 | 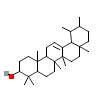 |
| 19 | Vasicinol | 442934 | 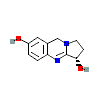 |

**Table 2: Prediction of Pharmacological Activity using PASS online Way2Drug**

| **S.No.** | **Phytocompound with PubChem ID** | **Pass prediction** |
| --- | --- | --- |
| 1 | 17 beta-Hydroxy-28-norolean-12-ene-3,16-dione (102067273) | 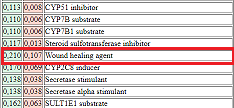 |
| 2 | 2,3,3-Trimethyl-2-(4methyl pentanoyl)- cyclopentanone (573846) | 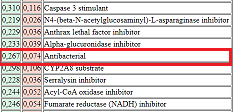 |
| 3 | 4-(2-methoxy phenyl) piperidine (544738) | 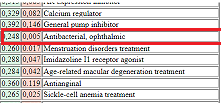 |
| 4 | 5- Benzyloxypyrimidine (561874) | 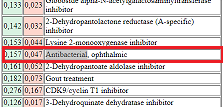 |
| 5 | Acacetin (5280442) | 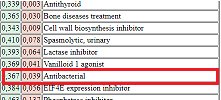 |
| 6 | Benzofuran 2,3 dihydro (20209882) | 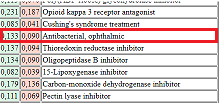 |
| 7 | Diethyl phthalate (6781) | 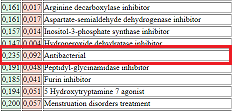 |
| 8 | Ephedrine (9294) | 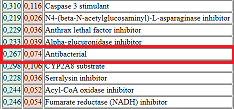 |
| 9 | Epicatechin (72276) | 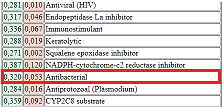 |
| 10 | Indirubin (10177) | 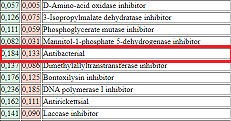 |
| 11 | Indigo (10215) | 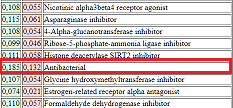 |
| 12 | Isatin (7054) | 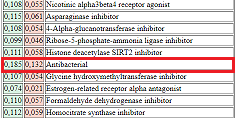 |
| 13 | Palmitic acid (985) | 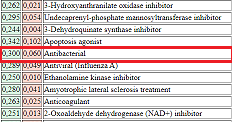 |
| 14 | Phytol (5280435) | 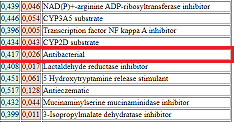 |
| 15 | Purpurin (6683) | 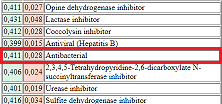 |
| 16 | Semiglabrin (156341) | 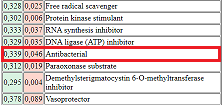 |
| 17 | Ursolic acid (64945) | 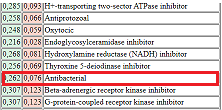 |
| 18 | Urs-12-en-3beta-ol (225688) | 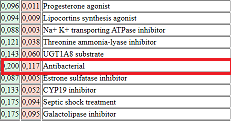 |
| 19 | Vasicinol (442934) | 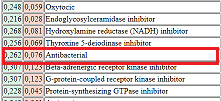 |

**Note: The respective activity predicted for each compound are highlighted.**

| **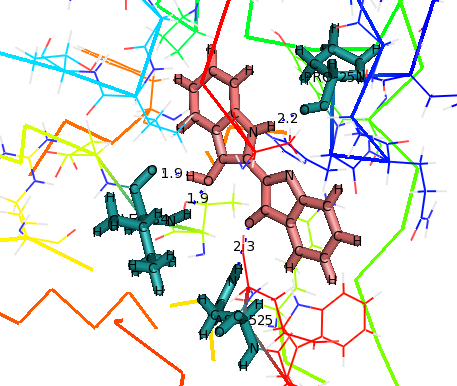**   1. **Indigo (a)** | **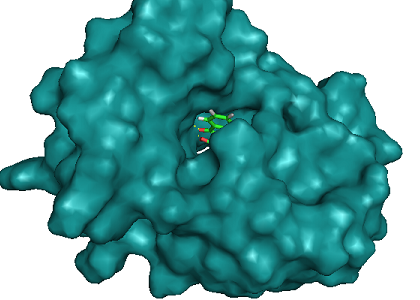**  **(b)** |
| --- | --- |
| **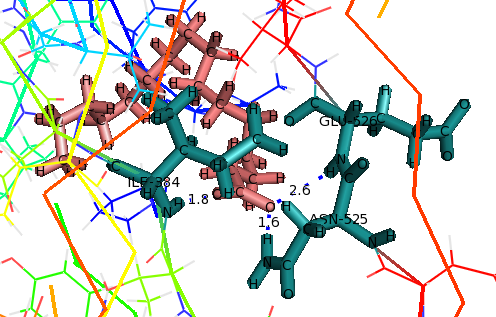**   1. **Palmitic acid (a)** | **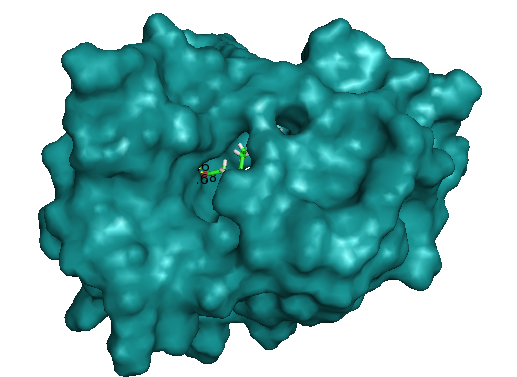**  **(b)** |
| **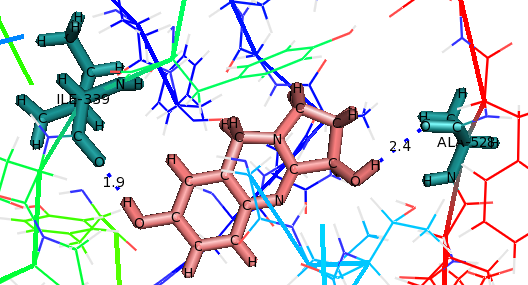**   1. **Vasicinol (a)** | **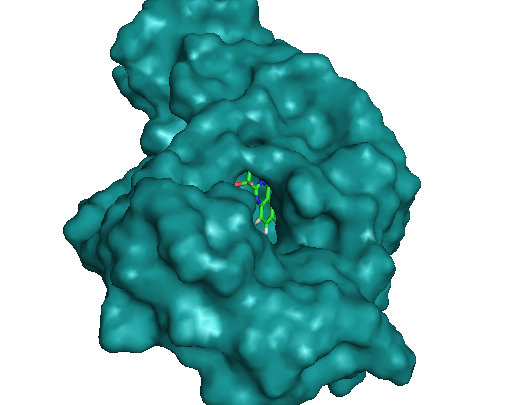**  **(b)** |
| **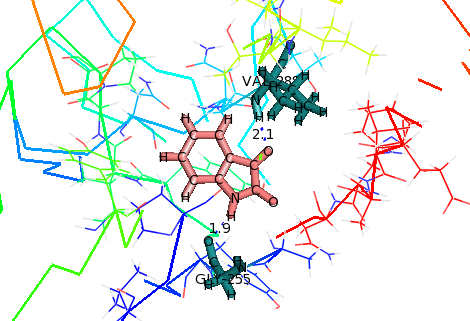**   1. **Isatin (a)** | **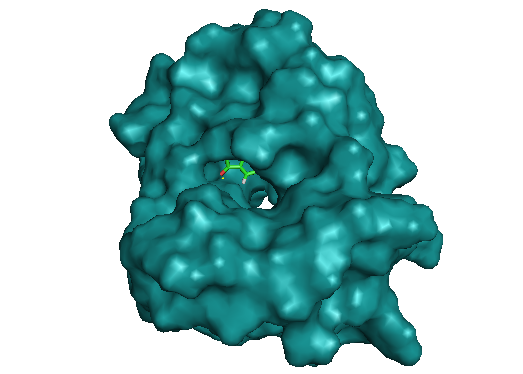**  **(b)** |
| **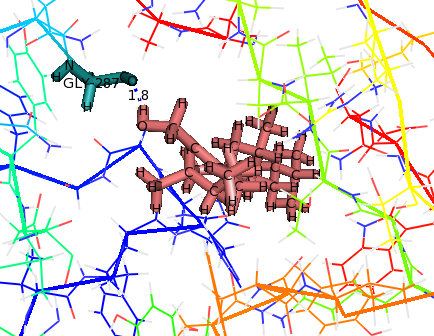**   1. **Phytol (14)** | **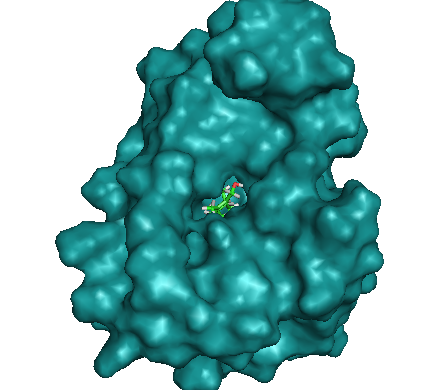**  **(b)** |
| **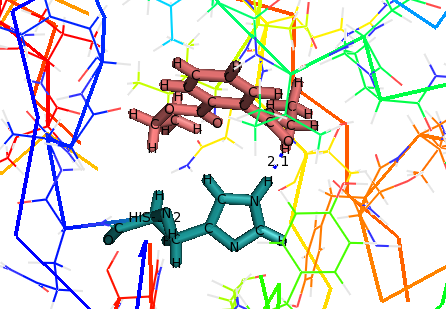**   1. **Diethyl phthalate (a)** | **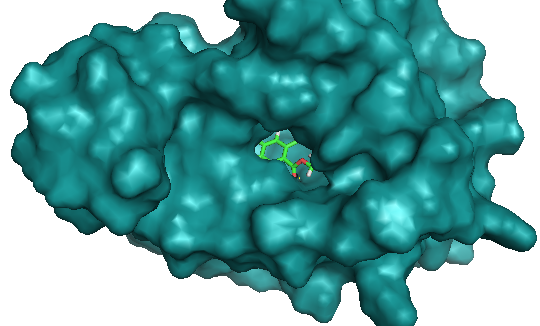**  **(b)** |
| **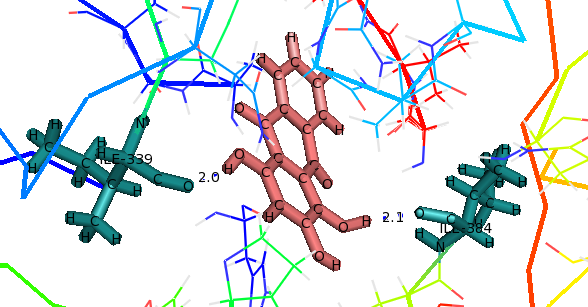**   1. **Purpurin (a)** | **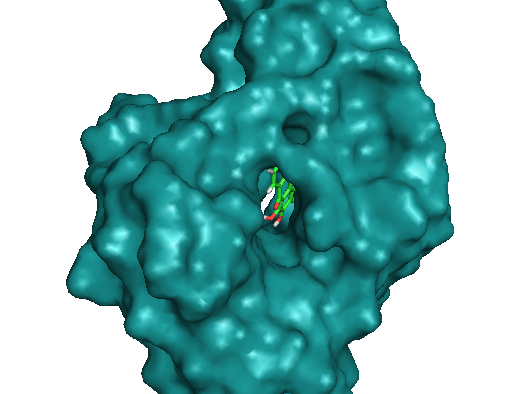**  **(b)** |
| **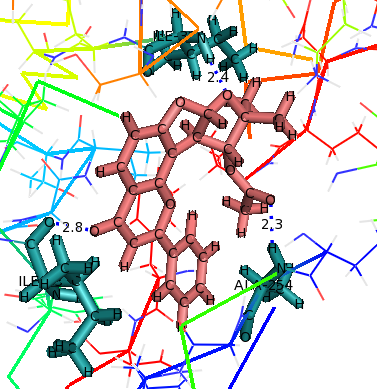**   1. **Semiglabrin (a)** | **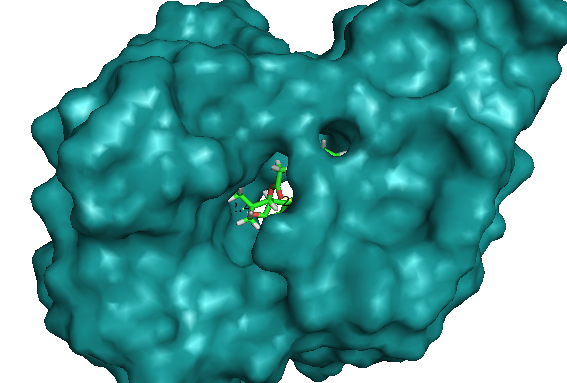**  **(b)** |
| **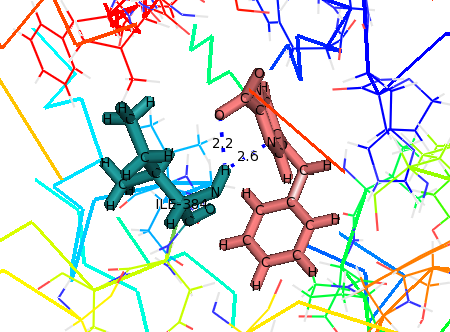**   1. **5- Benzyloxypyrimidine (a)** | **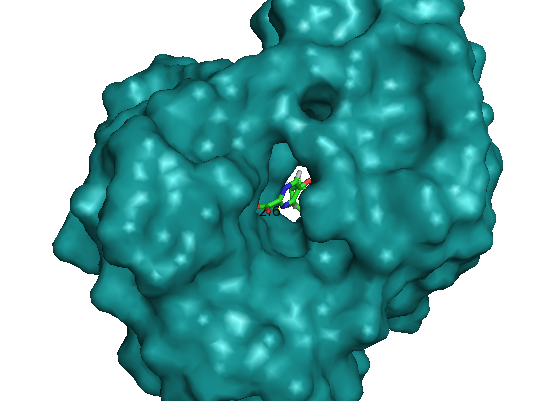**  **(b)** |
| **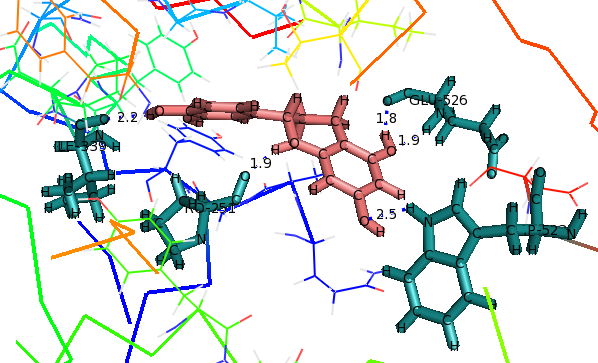**   1. **Epicatechin (a)** | **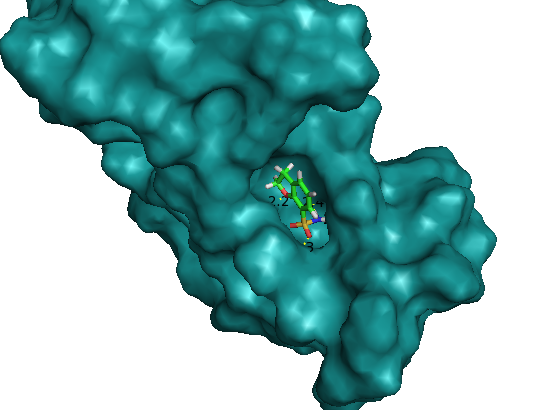**  **(b)** |
| **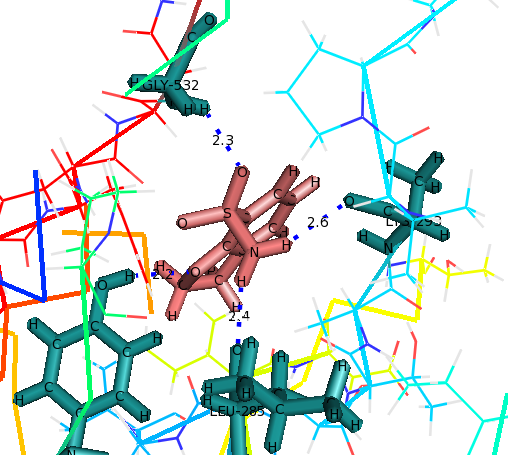**   1. **Benzofuran 2,3 dihydro (a)** | **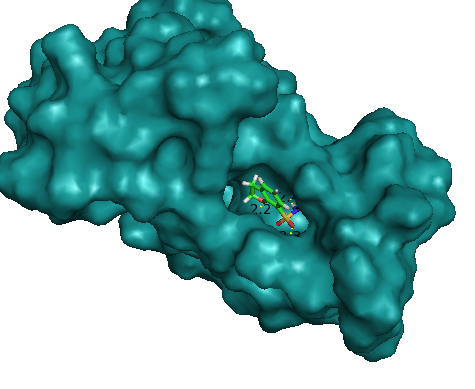**  **(b)** |
| **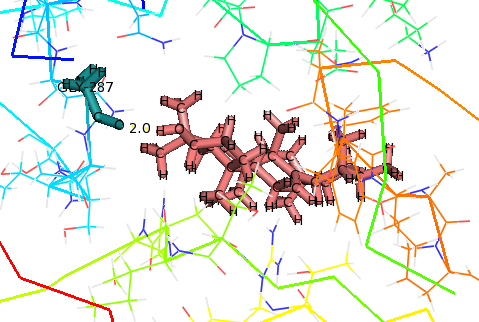**   1. **Urs-12-en-3beta-ol (b)** | **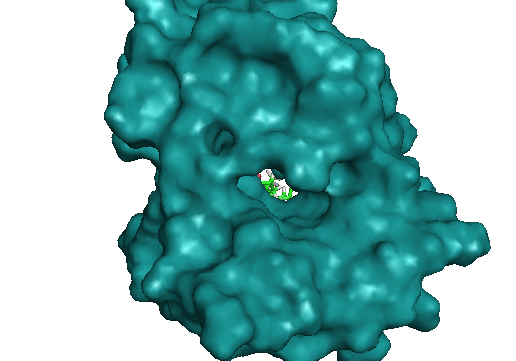**  **(b)** |
| **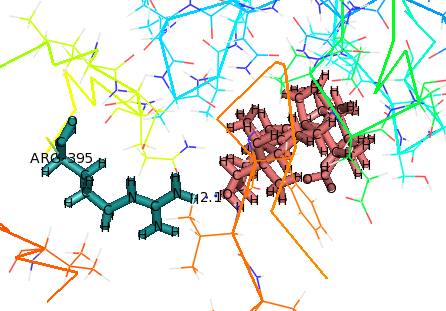**   1. **Ursolic acid (a)** | **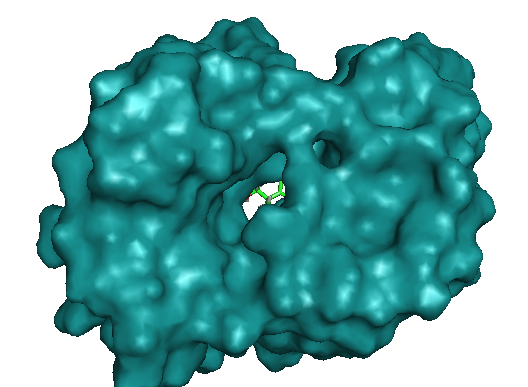**  **(b)** |

**Fig. 21: Hydrogen bond interaction with target protein Clumping factor A (ClfA: PDB-ID- 2VR3)**

Note: The compounds are listed based on their G.score value 1. Indigo; 9. Palmitic acid; 2. Vasicinol; 3. Isatin; 4. Phytol; 5. Diethyl phthalate, 6. Diethyl phthalate; 7. Purpurin; 8. Semiglabrin; 9. 5- Benzyloxypyrimidine; 10. Epicatechin; 11. Benzofuran 2,3 dihydro; 12. Urs-12-en-3beta-ol: 13. Ursolic acid; In the figure a. Represents the hydrogen bond interaction of each compound with the target protein and b. Protein-ligand complex in space filling representation
